# Supplementary material for: High-fidelity national carbon mapping for resource management and REDD+
Source: PubMed Central journal article supplement (PMC3717137; doi:10.1186/1750-0680-8-7), 2013-07-16
Supplement: 1750-0680-8-7-S1.pdf [file 1750-0680-8-7-S1.pdf]

1 **Additional File 1**

2 Tables S1-S5. This file provides tables on field plots, allometrics, national modeling, and validation.

3 **Table S1.** Summary of field plots used to calibrate and validate LiDAR-based observations of forest  
 4 structure. Plot configurations for BCI, SHRM, and GIG were 0.36 ha, 0.40-0.48 ha, and 0.80-1.00 ha  
 5 respectively. We retained the configuration used by Mascaro et al. (2011a) for BCI that arbitrarily  
 6 excludes a small portion of this 50 ha plot, which is not perfectly divisible by 0.36 ha. Mascaro et al.  
 7 (Mascaro et al. 2011b) consider the variation in plot size and shape in detail. With greater  
 8 understanding of the associated LiDAR calibration errors, Asner and Mascaro (submitted) utilized  
 9 partitions of the SHRM an GIG plots at larger scales. Several 0.04 ha quadrats of the SHRM plot were  
 10 excluded because their LiDAR height data were contaminated by the 60m+ canopy crane.

| Area                        | Notes                                          | Number of plots | Total area (ha) |
|-----------------------------|------------------------------------------------|-----------------|-----------------|
| <i>Calibration</i>          |                                                |                 |                 |
| Barro Colorado Island (BCI) | Old-growth and old secondary moist forests     | 128*            | 46.1            |
| Agua Salud (AS)             | Secondary moist forest, 1 to ~ 50 years of age | 100             | 11.6            |
| <i>Validation</i>           |                                                |                 |                 |
| Gigante (GIG)               | Old-growth and old secondary moist forests     | 40*             | 38.4            |
| Sherman (SHRM)              | Old-growth and old secondary wet forests       | 13*             | 5.4             |
| Azuero (AZ)                 | Secondary dry forest                           | 33              | 3.3             |
| Colon (COL)                 | Mangrove forest                                | 5               | 1.3             |

\*Single large mapped plot, apportioned into smaller sections.

11

12

13 **Table S2.** Summary of allometries used to estimate field-level aboveground carbon stocks, in each case  
 14 following the Chave et al. (2005) “model 1” framework. AGB is aboveground biomass (kg) and H is  
 15 height (m). Polynomial D to H model is based on unpublished data for Central Panama by J. Wright,  
 16 fitting described in Asner et al. (2012). This model was also used for nearby wet forests at SHRM. For  
 17 dry and mangrove forests, no field inventory height data was available; in these cases, maximum LIDAR  
 18 height in each plot was fit as a power function of maximum diameter, and the resulting equation was  
 19 used as a surrogate diameter-height allometry (fit using a non-arithmetic error term in the model, see  
 20 Mascaro et al. 2011c) to prevent overestimation of AGB (Feldpausch et al. 2012).

21

| Ecotype                             | Model                                                                    | Notes                      |
|-------------------------------------|--------------------------------------------------------------------------|----------------------------|
| <i>Wet forests (SHRM)</i>           |                                                                          |                            |
|                                     | $AGB = 0.0776(\rho D^2 H)^{0.940}$                                       | Chave et al. (2005)        |
|                                     | $H = \exp(0.862 + 0.611\ln(D) + 0.051\ln(D)^2 - 0.013\ln(D)^3) * 1.0253$ | Asner et al. (2012)        |
| <i>Moist forests (BCI, AS, GIG)</i> |                                                                          |                            |
|                                     | $AGB = 0.0509(\rho D^2 H)$                                               | Chave et al. (2005)        |
|                                     | $H = \exp(0.862 + 0.611\ln(D) + 0.051\ln(D)^2 - 0.013\ln(D)^3) * 1.0253$ | Asner et al. (2012)        |
| <i>Dry forests (AZ)</i>             |                                                                          |                            |
|                                     | $AGB = 0.112(\rho D^2 H)^{0.916}$                                        | Chave et al. (2005)        |
|                                     | $H = 3.5409D^{0.3900}$                                                   | This study, LiDAR assisted |
| <i>Mangrove forests (COL)</i>       |                                                                          |                            |
|                                     | $AGB = 0.0509(\rho D^2 H)$                                               | Chave et al. (2005)        |
|                                     | $H = 2.8407D^{0.5464}$                                                   | This study, LiDAR assisted |

22

23 **Table S3.** Linear models used to re-scale MODIS CLASlite results, based on a subset of 107,650 co-  
 24 occurring MODIS and Landsat pixels at 1-ha resolution collected adjacent to the greatest density of  
 25 masked Landsat pixels (i.e., the areas nearest to areas without Landsat data in which MODIS data would  
 26 be used). All models were significant at  $P < 0.0001$ . Values predicted to have negative fractional cover  
 27 were forced to zero.

| MCU component                | Model                              | Adj R2 |
|------------------------------|------------------------------------|--------|
| Soil                         | $Landsat = 5.7096MODIS + 0.3318$   | 0.07   |
| Photosynthetic Veg (PV)      | $Landsat = -33.4624MODIS + 1.2497$ | 0.54   |
| Non-photosynthetic Veg (NPV) | $Landsat = 10.9643MODIS + 0.9756$  | 0.40   |

28

29

30

31 **Table S4.** Bins used to produce the primary stratification of environmental variables in Panama (2039  
 32 unique classes; see Appendix 1). Soil, PV, and NPV reflect fractional cover of soil, photosynthetic  
 33 vegetation, and non-photosynthetic vegetation produced by CLASlite (see Fig. 1b). Elevation, slope and  
 34 aspect are derived products from the Shuttle Radar Topography Mission (SRTM), while precipitation and  
 35 seasonality are derived, annual products from the Tropical Rainfall Mapping Mission (TRMM; Fig. S3). In  
 36 the later case, seasonality reflects the number of months per year estimated to have < 100 mm of  
 37 precipitation. Brackets represent inclusive bins, while parentheses represent exclusive bins.

| Soil         | PV           | NPV          | Elevation      | Slope        | Aspect      | Precipitation   | Seasonality |
|--------------|--------------|--------------|----------------|--------------|-------------|-----------------|-------------|
| [ 0 , 10 )   | [ 0 , 20 )   | [ 0 , 20 )   | [ 0 , 100 )    | [ 0 , 15 )   | [ -1 , 0 )  | [ 0 , 2000 )    | [ 0 , 4 )   |
| [ 10 , inf ) | [ 20 , 40 )  | [ 20 , inf ) | [ 100 , 500 )  | [ 15 , 45 )  | [ 0 , inf ) | [ 2000 , 4000 ) | [ 4 , inf ) |
|              | [ 40 , 60 )  |              | [ 500 , 1500 ) | [ 45 , inf ) |             | [ 4000 , inf )  |             |
|              | [ 60 , 80 )  |              | [ 1500 , inf ) |              |             |                 |             |
|              | [ 80 , 90 )  |              |                |              |             |                 |             |
|              | [ 90 , 95 )  |              |                |              |             |                 |             |
|              | [ 95 , 98 )  |              |                |              |             |                 |             |
|              | [ 98 , 99 )  |              |                |              |             |                 |             |
|              | [ 99 , inf ) |              |                |              |             |                 |             |

38

39

40 **Table S5.** Six arbitrarily selected target ecoregions used for validation of stratification and decision tree  
41 modeling of carbon stocks in Panama. Bias and noise for these regions is shown in the main text (Fig. 5).  
42 Including these targeted ecoregions, a total of 86,351 ha of LiDAR data were used for validation (Fig. S6,  
43 S7).

| <b>Region</b>                              | <b>Area (ha)</b> |
|--------------------------------------------|------------------|
| Azuero (dry secondary forests)             | 6,711            |
| Agua Salud (young secondary moist forests) | 3,264            |
| Fortuna (montane wet forests)              | 6,680            |
| Colon (moist mangrove forests)             | 1,012            |
| Sherman (low elevation wet forests)        | 3,910            |
| BCI (low elevation moist forests)          | 1,059            |

44

45
